# Supplementary material for: Microchip integrating magnetic nanoparticles for allergy diagnosis
Source: Royal Society of Chemistry journal article supplement (doi:10.1039/c1lc20809h), 2011-01-01
Supplement: c1lc20809h.pdf [file c1lc20809h.pdf]

## Microchip Integrating Magnetic Nanoparticles for Allergy Diagnosis

Bruno Teste,<sup>a</sup> Florent Malloggi,<sup>b</sup> Jean-Michel Siaugue,<sup>a</sup> Anne Varenne,<sup>a</sup> Frederic Kanoufi,<sup>a</sup>  
and Stéphanie Descroix<sup>\*a</sup>

<sup>a</sup> Physicochimie des Electrolytes, Colloïdes et Sciences Analytiques (PECSA) UMR 7195  
CNRS-ESPCI-ENSCP, France. E-mail : [stephanie.descroix@espci.fr](mailto:stephanie.descroix@espci.fr)

<sup>b</sup> MMN - UMR 7083 - Gulliver CNRS-ESPCI, Paris, France

### S.1 Calibration curve of anti- $\alpha$ -lac IgG (AbI) obtained with ELISA technique.

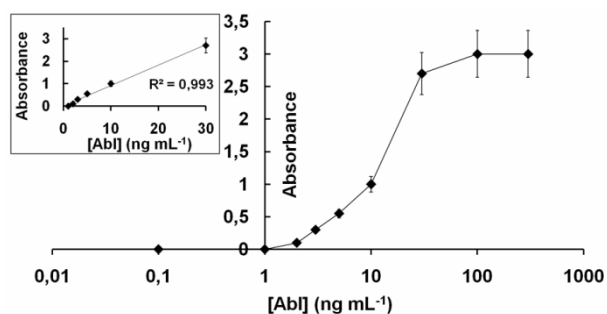

**Fig. S1.** Calibration curve of target AbI obtained in microplate using catalytic amplification for the detection step. Target AbI was incubate for 3 h, phosphatase alcaline labeled anti target AbI at 1  $\mu\text{g mL}^{-1}$  was incubate for 2 h and after washing step, p-nitro phenyl phosphate (pNPP) substrate was incubate for 30 min and colored product was read at 405 nm. The inset is a focused on the 0-30  $\text{ng mL}^{-1}$  concentration range which exhibits a good linearity.
